# Supplementary material
Source: bioRxiv or medRxiv preprint supplement (https://medrxiv.org/highwire/filestream/90565/field_highwire_adjunct_files/0/2020.07.22.20159202-1.pdf)
Supplement: Supplementary file [file 2020.07.22.20159202-1.pdf]

## **Supplementary Material**

### Criteria for hospital admission

- a. Admit all patients with suspected Covid-19 and oxygen saturations  $<90\%$  by pulse oximetry.
- b. Admits for oxygen saturations 91-94% if
  - i.  $\geq 65$  years age and comorbidities (diabetes, chronic lung, liver or kidney disease or on immunosuppressants)
  - ii.  $<65$  years if considerable gastrointestinal losses
  - iii. Regardless of age if patient from nursing home/congregate setting
- c. Admit for oxygen saturation  $\geq 95\%$  if
  - i. Patient from a nursing home/shelter or similar congregate setting
